# Supplementary material for: Homozygous NOTCH3 null mutation and impaired NOTCH3 signaling in recessive early-onset arteriopathy and cavitating leukoencephalopathy
Source: PubMed Central journal article supplement (PMC4459822; doi:10.15252/emmm.201404399), 2015-04-13

**a**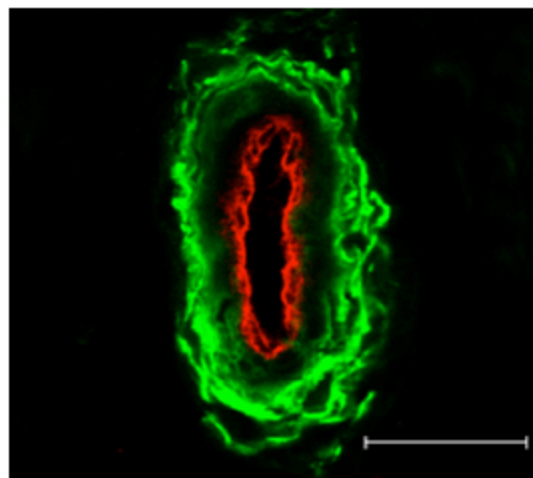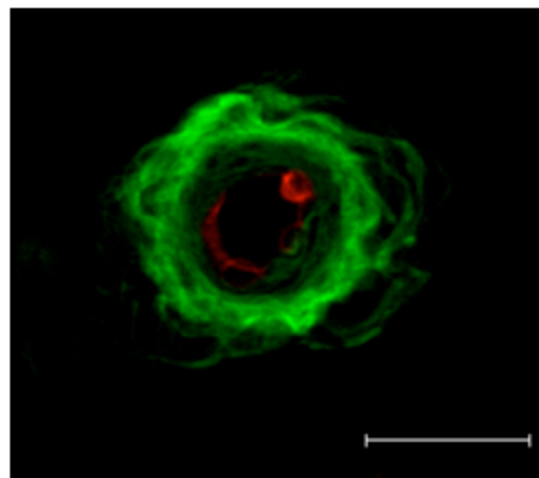**b**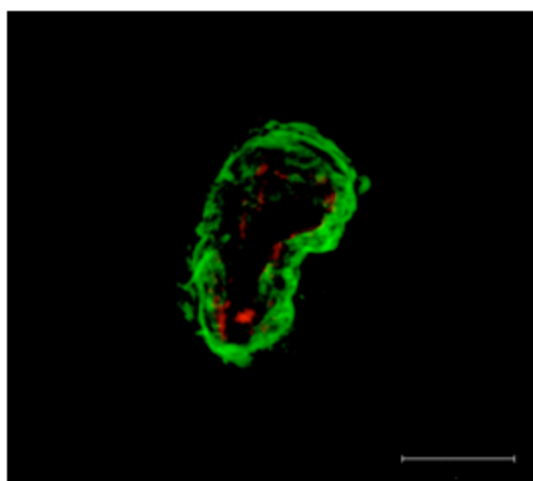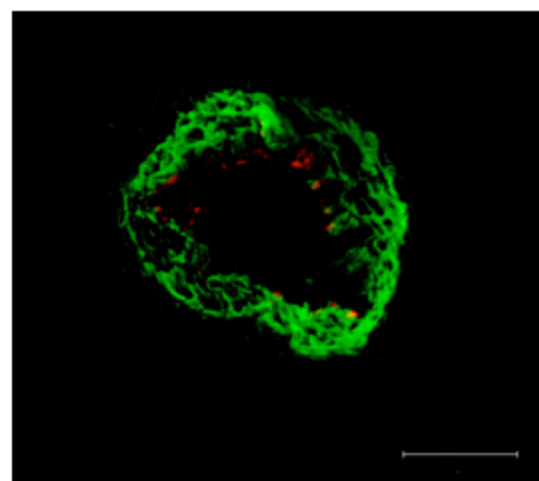**c**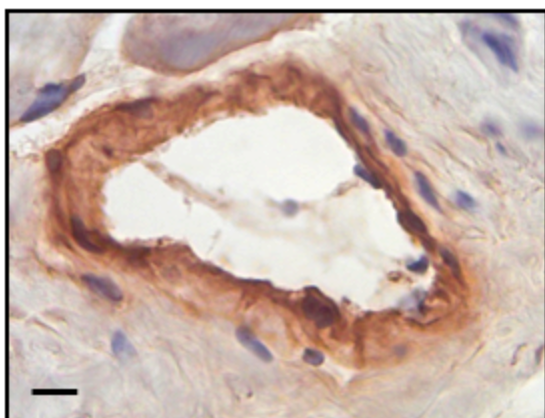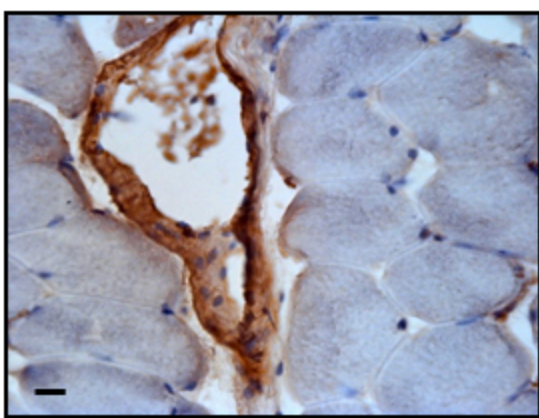**d**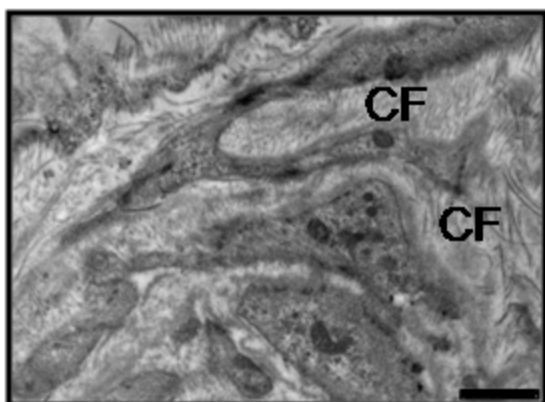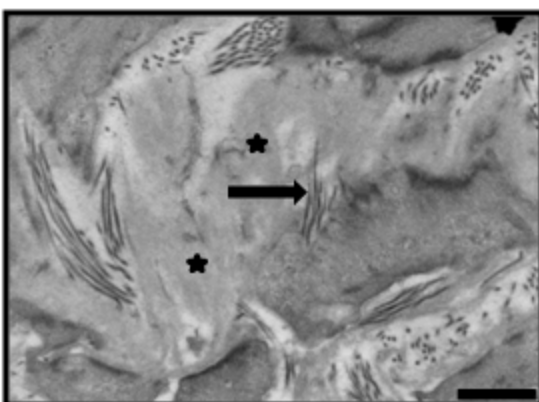**e**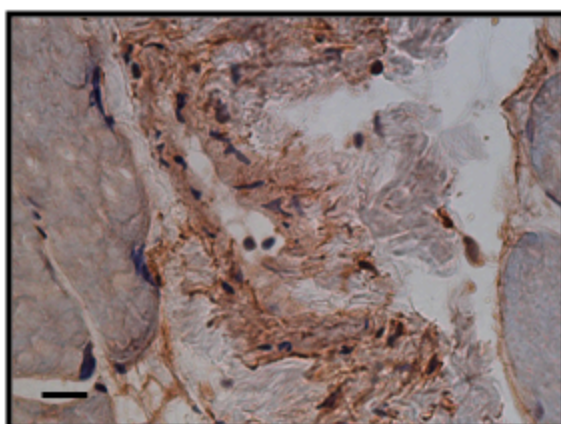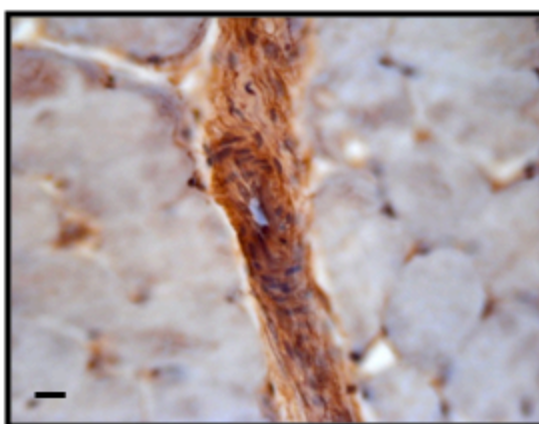

Supplement: emmm0007-0848-sd4.pdf [file emmm0007-0848-sd4.pdf]
