# Supplementary material for: Homozygous NOTCH3 null mutation and impaired NOTCH3 signaling in recessive early-onset arteriopathy and cavitating leukoencephalopathy
Source: PubMed Central journal article supplement (PMC4459822; doi:10.15252/emmm.201404399), 2015-04-13
Supplement: emmm0007-0848-sd6.pdf [file emmm0007-0848-sd6.pdf]

| Genes  | I:1 (Mother)       |                             | I:2 (Father)       |                  | II:1 (Proband)     |                  | CADASIL            |                  |
|--------|--------------------|-----------------------------|--------------------|------------------|--------------------|------------------|--------------------|------------------|
|        | <i>fold change</i> | <i>p value</i> <sup>1</sup> | <i>fold change</i> | <i>p value</i>   | <i>fold change</i> | <i>p value</i>   | <i>fold change</i> | <i>p value</i>   |
| NOTCH3 | 0,8                | 0,029                       | <b>0,44</b>        | <b>&lt;0,001</b> | <b>0,1</b>         | <b>&lt;0,001</b> | <b>0,4</b>         | <b>&lt;0,001</b> |
| PERP   | 1,4                | 0,029                       | 1,3                | 0,147            | 0,7                | 0,003            | <b>0,4</b>         | <b>&lt;0,001</b> |
| PLN    | 1,6                | 0,478                       | 1,5                | 0,478            | 0,8                | 0,003            | 1,0                | 0,002            |
| TBX2   | 1,2                | 0,478                       | 0,8                | 0,029            | <b>0,1</b>         | <b>&lt;0,001</b> | <b>0,3</b>         | <b>&lt;0,001</b> |
| SUSD5  | 1,2                | 0,706                       | 1,4                | 0,706            | 0,7                | 0,038            | 1,3                | 0,807            |
| TIMP4  | 1,6                | <0,001                      | 1,0                | 1,000            | <b>2,2</b>         | <b>&lt;0,001</b> | 0,6                | <0,001           |
| PTP4A3 | 1,1                | 0,003                       | 0,7                | <0,001           | 0,9                | 0,003            | 0,6                | <0,001           |
| GRIP2  | 1,0                | 0,478                       | <b>0,5</b>         | <b>&lt;0,001</b> | 0,7                | 0,003            | 1,0                | 0,084            |
| KCNA5  | 1,2                | 1,000                       | 0,7                | 0,147            | <b>0,3</b>         | <b>&lt;0,001</b> | 0,7                | 0,001            |
| NRIP2  | 1,5                | 1,000                       | <b>0,5</b>         | <b>&lt;0,001</b> | <b>0,4</b>         | <b>&lt;0,001</b> | 0,7                | <0,001           |
| S1PR3  | <b>2,7</b>         | <b>0,003</b>                | 1,5                | 0,028            | 0,9                | 0,478            | <b>0,4</b>         | <b>&lt;0,001</b> |
| PGAM2  | 1,3                | 0,029                       | 0,9                | 0,729            | 0,8                | 0,063            | 1,6                | 0,128            |
| CDH6   | 1,5                | 0,029                       | 1,4                | 0,478            | <b>0,4</b>         | <b>&lt;0,001</b> | 0,7                | <0,001           |
| XIRP1  | 1,3                | 0,478                       | <b>0,4</b>         | <b>&lt;0,001</b> | 0,7                | 0,029            | <b>0,5</b>         | <b>&lt;0,001</b> |
| HEY1   | <b>2,3</b>         | <b>&lt;0,001</b>            | 1,5                | 0,478            | 1,1                | 1,000            | 2,3                | 0,009            |
| HES1   | 0,9                | 0,478                       | 1,0                | 1,000            | 1,5                | 0,147            | 1,2                | 0,669            |
| HEYL   | 1,8                | 0,147                       | 0,9                | 0,478            | 1,2                | 0,147            | 0,8                | 0,084            |
| RCAN2  | n.d                |                             | n.d                |                  | n.d                |                  | n.d                |                  |
| ANGPT4 | n.d                |                             | n.d                |                  | n.d                |                  | n.d                |                  |
| HP     | n.d                |                             | n.d                |                  | n.d                |                  | n.d                |                  |
| SORBS2 | n.d                |                             | n.d                |                  | n.d                |                  | n.d                |                  |

**Table S1. Expression levels fold changes relative to controls (n=6) and associated p-values for NOTCH3 and NOTCH3 target genes in the proband, his parents and CADASIL patients (n=3).**

<sup>1</sup> p-values were calculated applying the Mann-Whitney U test and data were considered significant if associated with p- values  $\leq 0,003$  based on the Bonferroni correction for multiple tests. Relevant fold changes ( $\geq 2$  or  $\leq 0,5$ ) with significant p-values are highlighted.
