# Supplementary material for: Homozygous NOTCH3 null mutation and impaired NOTCH3 signaling in recessive early-onset arteriopathy and cavitating leukoencephalopathy
Source: EMBO Mol Med. 2015 Apr 13;7(6):848–58. doi: 10.15252/emmm.201404399 (PMC4459822; doi:10.15252/emmm.201404399)
Supplement: Supplementary file 7 [file emmm0007-0848-sd7.pdf]

| Analyzed genome mutations respect to rCRS |             |           |             |              | Site specific variability data   |                                   |                                  |                                   |                        |                                                                          |
|-------------------------------------------|-------------|-----------|-------------|--------------|----------------------------------|-----------------------------------|----------------------------------|-----------------------------------|------------------------|--------------------------------------------------------------------------|
| Mutation Type                             | AA Position | AA change | mtREV Index | Locus Name   | Human NT Site Variability Normal | Human NT Site Variability Patient | Human AA Site Variability Normal | Human AA Site Variability Patient | AA Variability Mammals | Disease Association (Mitomap)                                            |
| C -> T                                    |             |           |             | dloop        | <a href="#">0.702</a>            | <a href="#">0.348</a>             |                                  |                                   |                        |                                                                          |
| C -> T                                    |             |           |             | dloop        | <a href="#">0.805</a>            | <a href="#">0.655</a>             |                                  |                                   |                        |                                                                          |
| A -> G                                    |             |           |             | dloop        | <a href="#">0.120</a>            | <a href="#">0.038</a>             |                                  |                                   |                        |                                                                          |
| C -> T                                    |             |           |             | dloop        | <a href="#">0.112</a>            | <a href="#">0.034</a>             |                                  |                                   |                        |                                                                          |
| N -> A                                    |             |           |             | dloop        | <a href="#">0.014</a>            | <a href="#">0.043</a>             |                                  |                                   |                        |                                                                          |
| N -> C                                    |             |           |             | dloop        | <a href="#">0.002</a>            | <a href="#">0.042</a>             |                                  |                                   |                        |                                                                          |
| A -> G                                    |             |           |             | rRNA12s      | <a href="#">0.174</a>            | <a href="#">0.057</a>             |                                  |                                   |                        |                                                                          |
| A -> G                                    |             |           |             | rRNA12s      | <a href="#">0.172</a>            | <a href="#">0.061</a>             |                                  |                                   |                        |                                                                          |
| T -> C                                    |             |           |             | rRNA12s      | <a href="#">0.162</a>            | <a href="#">0.066</a>             |                                  |                                   |                        |                                                                          |
| A -> G                                    |             |           |             | rRNA16s      | <a href="#">0.306</a>            | <a href="#">0.192</a>             |                                  |                                   |                        |                                                                          |
| A -> G                                    |             |           |             | rRNA16s      | <a href="#">0.096</a>            | <a href="#">0.032</a>             |                                  |                                   |                        |                                                                          |
| C -> T                                    |             |           |             | rRNA16s      | <a href="#">0.096</a>            | <a href="#">0.028</a>             |                                  |                                   |                        |                                                                          |
| A -> G                                    | 58          | Syn(K)    | 99.342      | nd1          | <a href="#">0.199</a>            | <a href="#">0.070</a>             | <a href="#">0.003</a>            | <a href="#">0.000</a>             | 0.000                  |                                                                          |
| T -> C                                    | 96          | Syn(V)    | 98.467      | nd1          | <a href="#">0.165</a>            | <a href="#">0.055</a>             | <a href="#">0.007</a>            | <a href="#">0.032</a>             | 0.069                  |                                                                          |
| G -> A                                    | 266         | Syn(L)    | 99.142      | nd1          | <a href="#">0.162</a>            | <a href="#">0.055</a>             | <a href="#">0.002</a>            | <a href="#">0.000</a>             | 0.001                  |                                                                          |
| T -> C                                    |             |           |             | tRNA_ile     | <a href="#">0.059</a>            | <a href="#">0.016</a>             |                                  |                                   |                        |                                                                          |
| G -> A                                    | 415         | Syn(T)    | 98.287      | co1          | <a href="#">0.095</a>            | <a href="#">0.034</a>             | <a href="#">1.000</a>            | <a href="#">1.000</a>             | 0.829                  |                                                                          |
| T -> C                                    | 451         | Syn(N)    | 98.905      | co1          | <a href="#">0.163</a>            | <a href="#">0.060</a>             | <a href="#">0.061</a>            | <a href="#">0.000</a>             | 0.000                  |                                                                          |
| A -> G                                    |             |           |             | tRNA_asp     | <a href="#">0.177</a>            | <a href="#">0.072</a>             |                                  |                                   |                        |                                                                          |
| T -> C                                    | 219         | Syn(F)    | 99.343      | co2          | <a href="#">0.000</a>            | <a href="#">0.000</a>             | <a href="#">0.000</a>            | <a href="#">0.039</a>             | 0.000                  |                                                                          |
| T -> C                                    | 35          | Syn(L)    | 99.142      | atp8         | <a href="#">0.095</a>            | <a href="#">0.033</a>             | <a href="#">0.005</a>            | <a href="#">0.002</a>             | 0.722                  |                                                                          |
| T -> C                                    | 43          | Syn(I)    | 98.398      | atp6         | <a href="#">0.098</a>            | <a href="#">0.028</a>             | <a href="#">0.004</a>            | <a href="#">0.000</a>             | 0.157                  |                                                                          |
| G -> A                                    | 59          | Syn(T)    | 98.287      | atp6         | <a href="#">0.801</a>            | <a href="#">0.813</a>             | <a href="#">1.000</a>            | <a href="#">1.000</a>             | 0.677                  |                                                                          |
| C -> T                                    | 112         | Syn(L)    | 99.142      | co3          | <a href="#">0.797</a>            | <a href="#">0.812</a>             | <a href="#">0.029</a>            | <a href="#">0.000</a>             | 0.002                  |                                                                          |
| T -> C                                    | 164         | Syn(L)    | 99.142      | co3          | <a href="#">0.203</a>            | <a href="#">0.076</a>             | <a href="#">0.009</a>            | <a href="#">0.047</a>             | 0.714                  |                                                                          |
| A -> G                                    | 27          | Syn(M)    | 98.047      | nd4l         | <a href="#">0.192</a>            | <a href="#">0.066</a>             | <a href="#">0.028</a>            | <a href="#">0.000</a>             | 0.003                  |                                                                          |
| T -> C                                    | 65          | Syn(V)    | 98.467      | nd4l         | <a href="#">0.060</a>            | <a href="#">0.013</a>             | <a href="#">0.000</a>            | <a href="#">0.047</a>             | 0.000                  |                                                                          |
| A -> G                                    | 73          | Syn(V)    | 98.467      | nd4l         | <a href="#">0.099</a>            | <a href="#">0.028</a>             | <a href="#">0.026</a>            | <a href="#">0.013</a>             | 0.193                  |                                                                          |
| C -> T                                    | 17          | Syn(L)    | 99.142      | nd4          | <a href="#">0.103</a>            | <a href="#">0.032</a>             | <a href="#">0.007</a>            | <a href="#">0.008</a>             | 0.147                  |                                                                          |
| C -> T                                    | 38          | Syn(P)    | 99.583      | nd4          | <a href="#">0.797</a>            | <a href="#">0.808</a>             | <a href="#">0.000</a>            | <a href="#">0.000</a>             | 0.084                  |                                                                          |
| C -> T                                    | 52          | Syn(C)    | 99.290      | nd4          | <a href="#">0.091</a>            | <a href="#">0.064</a>             | <a href="#">0.052</a>            | <a href="#">0.000</a>             | 0.464                  |                                                                          |
| T -> C                                    | 180         | Syn(T)    | 98.287      | nd4          | <a href="#">0.205</a>            | <a href="#">0.069</a>             | <a href="#">0.000</a>            | <a href="#">0.000</a>             | 0.149                  |                                                                          |
| A -> G                                    | 236         | Syn(L)    | 99.142      | nd4          | <a href="#">0.502</a>            | <a href="#">0.363</a>             | <a href="#">0.016</a>            | <a href="#">0.029</a>             | 0.000                  | Diabetes mellitus type2 and somatic neuropathy                           |
| A -> G                                    | 385         | Syn(T)    | 98.287      | nd4          | <a href="#">0.341</a>            | <a href="#">0.204</a>             | <a href="#">0.001</a>            | <a href="#">0.000</a>             | 0.419                  |                                                                          |
| A -> G                                    |             |           |             | tRNA_leu_cun | <a href="#">0.500</a>            | <a href="#">0.357</a>             |                                  |                                   |                        |                                                                          |
| G -> A                                    | 12          | Syn(L)    | 99.142      | nd5          | <a href="#">0.535</a>            | <a href="#">0.469</a>             | <a href="#">0.000</a>            | <a href="#">0.000</a>             | 0.006                  | Diabetes mellitus type2 and somatic neuropathy<br><a href="#">Glioma</a> |
| T -> C                                    | 123         | Syn(I)    | 98.398      | nd5          | <a href="#">0.976</a>            | <a href="#">1.000</a>             | <a href="#">0.005</a>            | <a href="#">0.059</a>             | 0.119                  |                                                                          |
| G -> A                                    | 257         | Syn(I)    | 98.398      | nd5          | <a href="#">0.191</a>            | <a href="#">0.079</a>             | <a href="#">0.683</a>            | <a href="#">0.302</a>             | 0.039                  |                                                                          |
| G -> A                                    | 314         | Syn(M)    | 98.047      | nd5          | <a href="#">0.058</a>            | <a href="#">0.013</a>             | <a href="#">0.587</a>            | <a href="#">0.169</a>             | 0.004                  |                                                                          |
| T -> C                                    | 390         | Syn(Y)    | 99.336      | nd5          | <a href="#">0.097</a>            | <a href="#">0.029</a>             | <a href="#">0.000</a>            | <a href="#">0.011</a>             | 0.000                  |                                                                          |
| T -> C                                    | 403         | Y -> H    | 169.000     | nd5          | <a href="#">0.000</a>            | <a href="#">0.024</a>             | <a href="#">0.001</a>            | <a href="#">0.082</a>             | 0.085                  |                                                                          |
| T -> C                                    | 438         | Syn(P)    | 99.583      | nd5          | <a href="#">0.166</a>            | <a href="#">0.055</a>             | <a href="#">0.000</a>            | <a href="#">0.043</a>             | 0.311                  |                                                                          |
| C -> T                                    | 7           | Syn(L)    | 99.142      | nd6          | <a href="#">0.194</a>            | <a href="#">0.068</a>             | <a href="#">0.001</a>            | <a href="#">0.000</a>             | 0.074                  |                                                                          |
| T -> C                                    | 18          | F -> L    | 328.000     | cytb         | <a href="#">0.322</a>            | <a href="#">0.163</a>             | <a href="#">0.494</a>            | <a href="#">0.234</a>             | 0.143                  |                                                                          |
| T -> Y                                    |             |           |             | dloop        | <a href="#">0.267</a>            | <a href="#">0.148</a>             |                                  |                                   |                        |                                                                          |
| A -> G                                    |             |           |             | dloop        | <a href="#">0.480</a>            | <a href="#">0.512</a>             |                                  |                                   |                        |                                                                          |
| T -> C                                    |             |           |             | dloop        | <a href="#">0.135</a>            | <a href="#">0.835</a>             |                                  |                                   |                        |                                                                          |
| C -> T                                    |             |           |             | dloop        | <a href="#">0.780</a>            | <a href="#">0.000</a>             |                                  |                                   |                        |                                                                          |
| T -> C                                    |             |           |             | dloop        | <a href="#">0.973</a>            | <a href="#">0.951</a>             |                                  |                                   |                        |                                                                          |
| T -> C                                    |             |           |             | dloop        | <a href="#">0.254</a>            | <a href="#">0.098</a>             |                                  |                                   |                        |                                                                          |
| G -> A                                    |             |           |             | dloop        | <a href="#">0.077</a>            | <a href="#">0.024</a>             |                                  |                                   |                        |                                                                          |

|        |  |  |  |       |                       |                       |  |  |  |  |
|--------|--|--|--|-------|-----------------------|-----------------------|--|--|--|--|
| T -> C |  |  |  | dloop | <a href="#">0.313</a> | <a href="#">0.236</a> |  |  |  |  |
|--------|--|--|--|-------|-----------------------|-----------------------|--|--|--|--|

**Deletions**

| From position       | To position | Locus Name | Haplogroup Code | Note |
|---------------------|-------------|------------|-----------------|------|
| <a href="#">825</a> | 825         | rRNA12s    |                 |      |

**Insertions**

| 5' position         | Length | Sequence | Locus Name | Haplogroup Code |
|---------------------|--------|----------|------------|-----------------|
| <a href="#">302</a> | 1      | C        | dloop      |                 |
| <a href="#">310</a> | 1      | C        | dloop      |                 |
| <a href="#">517</a> | 4      | CACA     | dloop      |                 |
| <a href="#">823</a> | 1      | T        | rRNA12s    |                 |

**Table S2. mtDNA variants in the proband.** Principal features of mtDNA polymorphisms detected in the proband.
